# Supplementary material
Source: Springer Nature journal article supplement (https://www.springermedizin.de/resource/supplementary/12967_2010_665_MOESM4_ESM.pdf/9577394)

|               |   |   |   |   |   |   |
|---------------|---|---|---|---|---|---|
| hFN           | - | - | + | + | - | + |
| RGDechiHCit   | - | + | - | + | - | - |
| c(RGDf[NMe]V) | - | - | - | - | + | + |

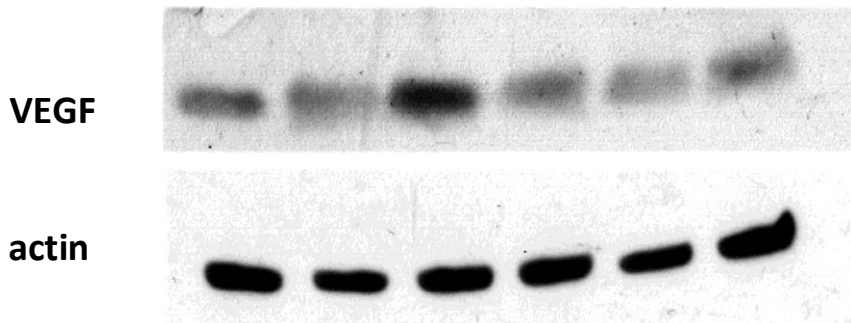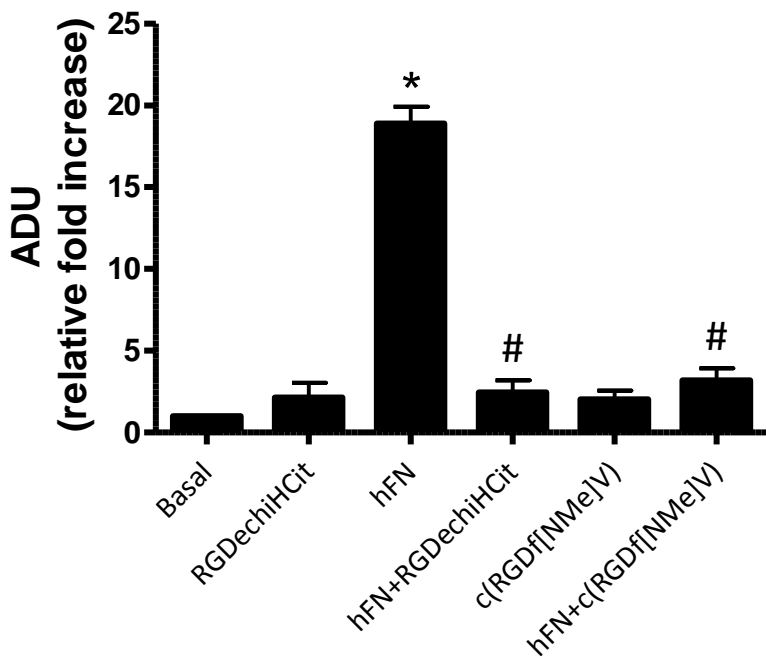

Supplement: MOESM4 [file 9577394]
